# Supplementary material
Source: Springer Nature journal article supplement (https://www.springermedizin.de/resource/supplementary/12885_2013_4689_MOESM3_ESM.pdf/9467038)
Supplement: MOESM3 [file 9467038]

## Supplemental Figure 3

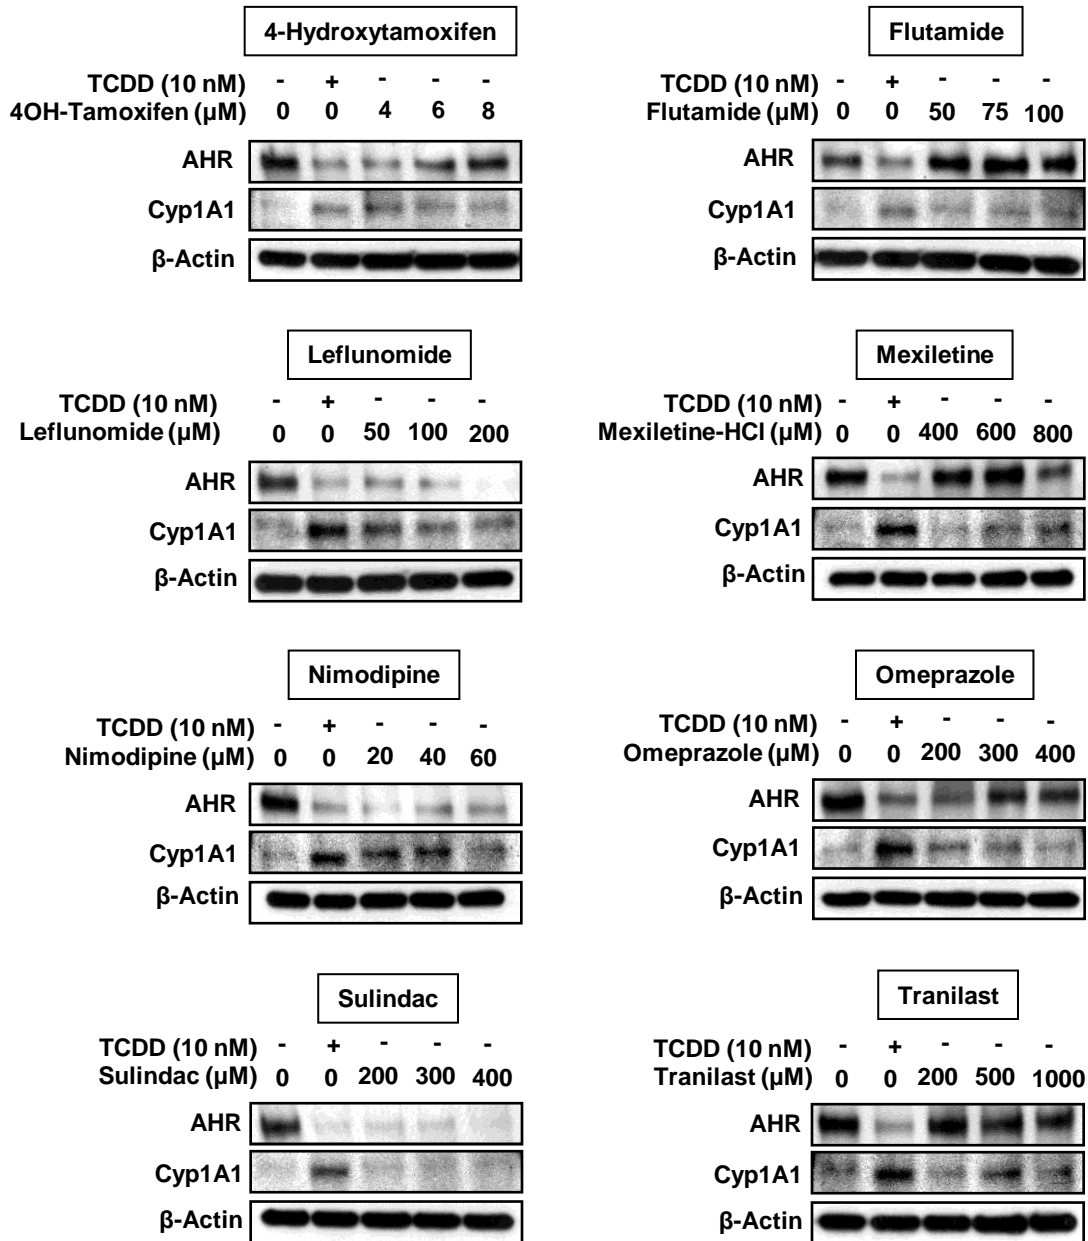

**Figure S3.** Effects of AHR-active pharmaceuticals and TCDD on CYP1A1 and AHR proteins. MDA-MB-231 cells were treated with DMSO, TCDD and AHR-active pharmaceuticals for 24 hr, and whole cell lysates were analyzed by western blots as outlined in the Materials and Methods.
